# Supplementary material
Source: Springer Nature journal article supplement (https://www.springermedizin.de/resource/supplementary/12936_2014_3219_MOESM4_ESM.pdf/9545354)
Supplement: MOESM4 [file 9545354]

**(A) Rural Nebbi household**

**Sleeping space 1**

No bednet.

No occupants on prior night.

**Sleeping space 3**

1-year old bednet.

Male, 50 yo. household head

**Sleeping space 2**

No bednet.

Male, 12 yo.

Male, 13 yo.

Female, 9 yo.

Female, 11 yo.

Female, 15 yo.

**Sleeping space 4**

No bednet.

Male, 3 yo.

Male, 4 yo.

Female, 45 yo.

**(B) Peri-urban Luwero household**

**Sleeping space 1**

1-year old bednet.

Male, 4 yo.

Female, 10 yo.

**Sleeping space 4**

No bednet.

Male, 6 yo.

Female, 4 yo.

**Sleeping space 2**

1-year old bednet.

Male, 1 yo.

Female, 2 yo.

**Sleeping space 5**

No bednet.

Male, age unknown

**Sleeping space 3**

1-year old bednet.

Male, 29 yo. household head

Female, 35 yo.
